# Supplementary material for: Diurnal, seasonal and long-term behaviour of high arctic tundra-heath ecosystem dynamics inferred from model ensembles constrained by time-integrated CO&lt;sub&gt;2&lt;/sub&gt; fluxes
Source: Copernicus journal article supplement (doi:10.5194/bg-2017-382), 2017-09-29
Supplement: Supplementary file 1 [file bg-2017-382-supplement.pdf]

# Supplementary materials

## Diurnal, seasonal and long-term behaviours of high Arctic tundra heath ecosystem dynamics inferred from model ensembles constrained by the time-integrated CO<sub>2</sub> fluxes

Wenxin Zhang<sup>1\*</sup>, Per-Erik Jansson<sup>1</sup> and Bo Elberling<sup>1</sup>

<sup>1</sup>Center for Permafrost (CENPERM), Department of Geosciences and Natural Resource Management, University of Copenhagen, Øster Voldgade 10, DK-1350 Copenhagen, Denmark

\*Correspondence to: W. Zhang ([zhang\\_wenxin2005@hotmail.com](mailto:zhang_wenxin2005@hotmail.com))

**Table S1 List of relevant equations and parameters used in this modelling study. The parameters denoted as bold type are selected for the Monte-Carlo multi-runs. A detailed description of all biotic and abiotic processes in the CoupModel can be referred to Jansson and Karlberg (2011) or the CoupModel home page (<http://www.coupmodel.com>).**

---

### *Snow dynamics*

---

(1) Snow densification as a function of ice and liquid water content

$$\rho_{oldsnow} = \rho_{newsnow} + s_{dl} \frac{S_{wl}}{S_{wl\max}} + s_{dw} S_{res} \quad \text{Eqn. S1}$$

$\rho_{oldsnow}$  : *DensityOfOldSnow* – Density of old snow (kg m<sup>-3</sup>)

$\rho_{newsnow}$  : *DensityOfNewSnow* – Density of new snow (kg m<sup>-3</sup>)

$s_{dl}$  : *DensityCoefWater* – Liquid water coefficient (kg m<sup>-3</sup>)

$S_{wl\max}$  : *WROfSnowMax* – Maximum water retention capacity in the snowpack (m)

$S_{wl}$  : *WROfSnow* – Water retention in the snowpack (m)

$s_{dw}$  : *DensityCoefMass* – Mass coefficient (m<sup>-1</sup>)

$S_{res}$  : *SWE* – Snow water equivalent (kg m<sup>-2</sup>)

(2) The upper limit of the aerodynamic resistance at extreme stable conditions

$$r_{aa,snow} = \left( \frac{1}{r_{aa,snow}^{-1}} + r_{a,\max,snow}^{-1} \right)^{-1} \quad \text{Eqn. S2}$$

$r_{a,\max,snow}^{-1}$  : *WindlessExSnow* – Minimum turbulent exchange coefficient (inverse of the maximum allowed aerodynamic resistance) over snow (s<sup>-1</sup>)

(3) The aerodynamic resistance at neutral conditions

$$r_{aa,snow} = \frac{1}{k^2 u} \ln \left( \frac{z_{ref} - d}{z_{OM,snow}} \right) \ln \left( \frac{z_{ref} - d}{z_{OH,snow}} \right) f(R_{ib}) \quad \text{Eqn. S3}$$

$u$  : *WindSpeed* – Wind speed at the reference height (m s<sup>-1</sup>)

$k$  : The von Karman's constant (-)

$d$  : *DisplacementHeight* – Displacement height (m)

$z_{ref}$  : *ReferenceHeight* – Reference height (m)

$R_{ib}$  : The bulk Richardson number (-)

---

---

$z_{OM,snow}$  : **RoughLMomSnow** – Roughness length for momentum above snow (m)

$z_{OH,snow}$  : **RoughLHSnow** – Roughness length for heat above snow (m)

(4) Snow albedo

$$a_{snow} = a_{min} + a_1 e^{a_2 S_{age} + a_3 \sum T_a} \quad \text{Eqn. S4}$$

$a_1, a_2, a_3$  : The parameters for calculating snow albedo (-)

$a_{min}$  : **AlbSnowMin** – The lowest albedo in the albedo function, which accounts for snow age and positive sum of air temperature since latest new snow (-)

---

### **Soil water and soil heat**

---

(5) The mixed composition of organic and mineral soil at the top layer

$$T_b = \frac{T_1 + aT_s}{1 + a} \quad \text{Eqn. S5}$$

$$a = \frac{k_{ho} (\Delta z_1 / 2 - \Delta z_{humus})}{k_{hm} \Delta z_{humus}} \quad \text{Eqn. S6}$$

$T_b$  : Boundary temperature between organic soil and mineral soil (°C)

$T_s$  : Soil surface temperature (°C)

$T_1$  : Top soil layer temperature (°C)

$k_{ho}$  : Conductivity of the organic soil (K m W<sup>-1</sup>)

$k_{hm}$  : Conductivity of the mineral soil (K m W<sup>-1</sup>)

$\Delta z_{humus}$  : **OrganicLayerThick** – Thickness of the organic layer (m)

$\Delta z_1$  : Thickness of the first soil layer (m)

$q_{h,low}$  : **GeothermalFlow** – Constant heat flow (J m<sup>2</sup> d<sup>-1</sup>)

(6) The vapor pressure at the soil surface

$$e_{corr} = 10^{-\delta_{surf} \psi_{eg}} \quad \text{Eqn. S7}$$

$\psi_{eq}$  : **EquilAdjustPsi** – The factor to account for the differences between water tension in the middle of top layer and vapor pressure at soil surface

$\delta_{surf}$  : **SurfmoistureBalance** – The flow variable for mass balance of water at the soil surface (mm)

(7) The correction of thermal conductivity in the upper soil layer due to freezing

$$R_f = e^{c_f T_s} c_{md} + (1 - c_{md}) \quad \text{Eqn. S8}$$

$R_f$  : **CorrFrozen** – The correction factor of thermal conductivity in the upper frozen soil

$c_{md}$  : **CFrozenMaxDamp** – The parameter for frozen surface damping function

$c_f$  : **CFrozenSurCorr** – The parameter for frozen surface damping function

(8) Surface water

$$q_{surf} = a_{surf} (W_{pool} - w_{pmax}) \quad \text{Eqn. S9}$$

$q_{surf}$  : **Surfrunoff** – Surface runoff (mm)

$a_{surf}$  : **SurfCoef** – First order rate coefficient used when calculating the surface runoff from the surface pool exceeding the

---

residual storage.

$W_{pool}$  : **SurfPool** – The total amount of water in the surface pool (mm)

$w_{p,max}$  : **SurfPoolMax** – The maximal amount of water stored on the soil surface without causing any surface runoff (mm)

(9) Precipitation

$$P = (c_{rain} + Qc_{snow})P_m \quad \text{Eqn. S10}$$

$c_{rain}$  : **PreA0Corr** – Wind correction for rain precipitation

$c_{snow}$  : **PreA1Corr** – Wind correction for snow precipitation

$P_m$  : **MeasPre** – Measured precipitation (mm)

(10) Altitude of simulated site

$e_{lesim}$  : **AltSimPosition** – The parameter used in the function of “air temperature affected by altitude”

(11) The fraction factor to calculate a residual unfrozen amount of water

$$\theta_f = d_1 \theta_{wilt} \quad \text{Eqn. S11}$$

$d_1$  : **FreezpointFWi** – The fraction of wilting point ( $\theta_{wilt}$ ) remaining as unfrozen water ( $\theta_f$ ) at -5 °C (-)

---

### Plan growth

---

(12) Light use efficiency approach

$$C_{Atm \rightarrow a} = f(T_1) f(CN, p_{fixedN}) f(E_{ta} / E_{tp}) R_{s,pl} \quad \text{Eqn. S12}$$

$C_{Atm \rightarrow a}$  : **CAtmNewMobile** – Carbon assimilation (g C m<sup>-2</sup> d<sup>-1</sup>)

$p_{fixedN}$  : **FixNSupply** – Nitrogen supply capacity for photosynthesis

$R_{s,pl}$  : **RadSPl** – Radiation absorbed by canopy (J m<sup>-2</sup> d<sup>-1</sup>)

$E_{ta}$  : **Eatr** – Actual transpiration (mm)

$E_{tp}$  : **Eptr** – Potential transpiration (mm)

(13) Leaf temperature response

$$f(T_1) = \begin{cases} 0 & T_1 < p_{mn} \\ (T_1 - p_{mn}) / (p_{o1} - p_{mn}) & p_{mn} \leq T_1 \leq p_{o1} \\ 1 & p_{mn} \leq T_1 \leq p_{o1} \\ 1 - (T_1 - p_{o2}) / (p_{mx} - p_{o2}) & p_{mn} \leq T_1 \leq p_{o1} \\ 0 & T_1 > p_{o1} \end{cases} \quad \text{Eqn. S13}$$

$p_{mn}$  : **TLMIn** – Minimum mean air temperature for photosynthesis (°C)

$p_{o1}$  : **TLOpt1** – Low limit mean air temperature for optimum photosynthesis (°C)

$p_{o2}$  : **TLOpt2** – High limit mean air temperature for optimum photosynthesis (°C)

$p_{mx}$  : **TLMax** – Maximum mean air temperature for photosynthesis (°C)

(14) Litter fall from leaves or roots

$$C_{Leaf \rightarrow LitterSurface} = f(l_{leaf/root}) C_{Leaf} \quad \text{Eqn. S14}$$

$l_{leaf}$  : **LeafRate** – Rate coefficient for the litter fall from leaves before the first threshold temperature sum is reached.

$l_{root}$  : **RootRate** – Rate coefficient for the litter fall from roots before the first threshold temperature sum is reached.

(15) The maintenance respiration of leaves or roots

---

---


$$C_{respleaf} = k_{mrespleaf} f(T_a) C_{Leaf} + k_{gresp} C_{a \rightarrow leaf} \quad \text{Eqn. S15}$$

$k_{mresproot}$  : **MCoeffRoot** – Maintenance respiration coefficient for roots (d<sup>-1</sup>)

$k_{mresleaf}$  : **MCoeffLeaf** – Maintenance respiration coefficient for leaves (d<sup>-1</sup>)

(16) The temperature response function for plant respiration

$$f(T) = t_{Q10}^{(T-t_{Q10bas})/10} \quad \text{Eqn. S16}$$

$t_{Q10}$  : **TempQ10** – Response to a 10 °C of soil temperature change on microbial activity, mineralization, immobilization, nitrification and denitrification (-)

(17)  $r_{Optimum}$  : **rOptimum** – Optimum root depth (m)

(18)  $N_{leaf}$  : **INleaf** – Initial nitrogen mass in leaves (g)

---

### Soil decomposition

(19) Decomposition of soil organic matter

$$C_{Decompl} = k_l f(T) f(\theta) C_{Litter} \quad \text{Eqn. S17}$$

$k_l$  : **RateCoefLitter** – Rate coefficient for the decay of litter (d<sup>-1</sup>)

$$C_{Decompl} = k_h f(T) f(\theta) C_{Humus} \quad \text{Eqn. S18}$$

$k_h$  : **RateCoefHumus** - Rate coefficient for the decay of humus (d<sup>-1</sup>)

(20) Soil temperature response for soil decomposition using the Ratkowsky function

$$f(\theta) = 1 \quad T > t_{max}$$

$$f(T) = \left( \frac{T - t_{min}}{t_{max} - t_{min}} \right)^2 \quad t_{min} < T < t_{max} \quad \text{Eqn. S19}$$

$$f(\theta) = 0 \quad T < t_{min}$$

$t_{min}$  : **TempMin**- Minimum temperature for microbial activity, mineralization-immobilization, nitrification and denitrification in the Ratkowsky function (°C). Below this temperature, the response function is 0.

$t_{max}$  : **TempMax** – Maximum temperature at which the response on microbial activity, mineralization-immobilization, nitrification and denitrification in the Ratkowsky function (°C). Above this temperature, the response function is 1.

(21) Soil moisture response function for soil decomposition

$$f(\theta) = p_{\theta satact} \quad \theta = \theta_s$$

$$f(\theta) = \min \left( \left( \frac{\theta_s - \theta}{P_{\theta Upp}} \right)^{p_{\theta p}} (1 - p_{\theta satact}) + p_{\theta satact}, \left( \frac{\theta - \theta_{wilt}}{P_{\theta Low}} \right)^{p_{\theta p}} \right) \quad \theta_{wilt} < \theta < \theta_s \quad \text{Eqn. S20}$$

$$f(\theta) = 0 \quad \theta < \theta_{wilt}$$

$P_{\theta Low}$  : **ThetaLowerRange** - Water content interval in the soil moisture response function for microbial activity, mineralization-immobilization, nitrification and denitrification (vol %). The response increases from 0 at the wilting point to optimum at the end of the interval.

$\theta$  : Actual soil moisture content (vol %)

$\theta_{wilt}$  : Soil moisture content at the wilting point (vol %)

$\theta_s$  : Soil moisture at saturation (vol %)

$P_{\theta Upp}$  : The water content interval in the soil moisture response function for microbial activity, mineralization-

---

immobilization, nitrification and denitrification. The response decreases from optimum at the beginning of the interval to saturation activity at saturation.

$P_{\theta_{Satact}}, P_{\theta_p}$  : Coefficient in the soil moisture response function (-)

---

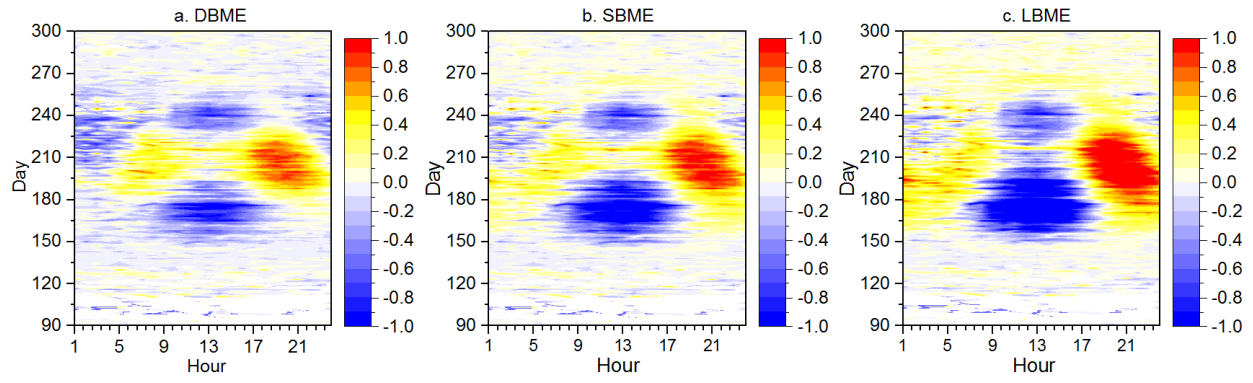

**Figure S1.** Hourly residuals (the model minus measurements,  $\text{g C m}^{-2}$ ) of the days in three behavior model ensembles. **a.** DBME, the diurnal behavior model ensemble. **b.** SBME, the seasonal behavior model ensemble. **c.** LBME, the long-term behavior model ensemble.

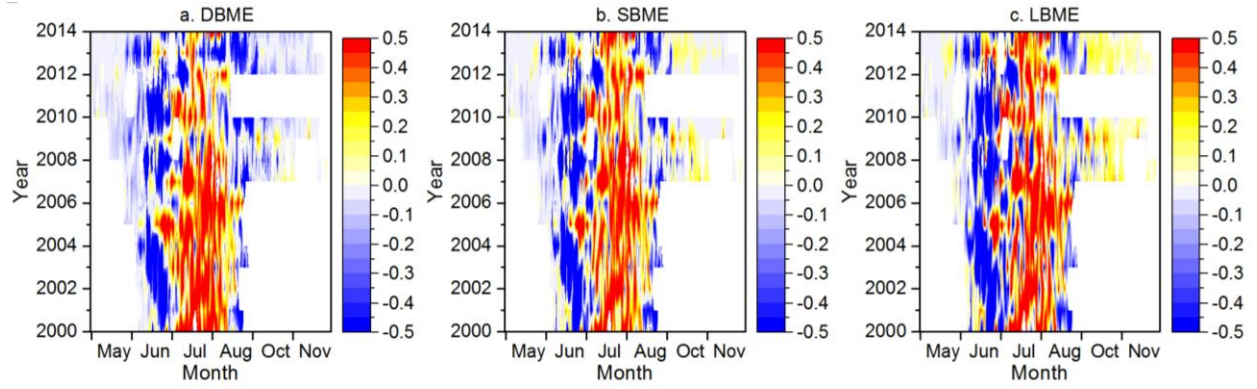

**Figure S2. Daily residuals (the model minus measurements,  $\text{g C m}^{-2}$ ) of the years in three behavior model ensembles. a. DBME, the diurnal behavior model ensemble. b. SBME, the seasonal behavior model ensemble. c. LBME, the long-term behavior model ensemble.**

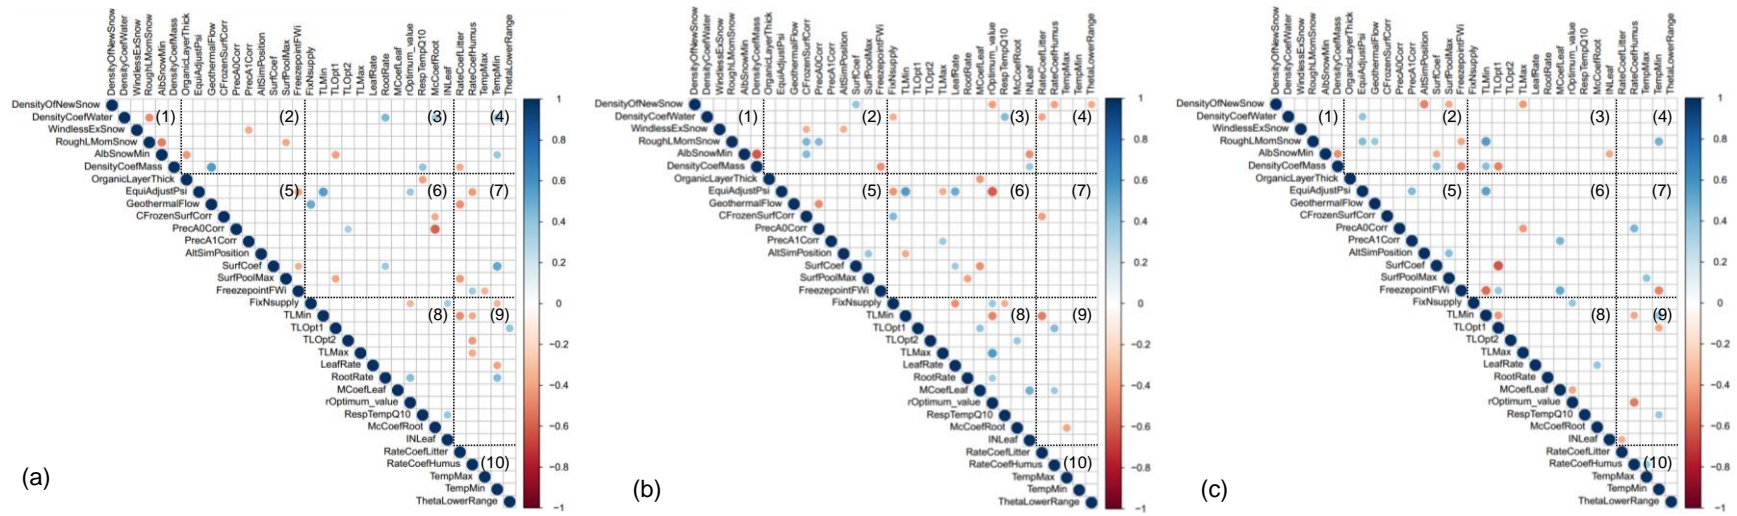

**Figure S3.** The inter-correlations (-1, 1) for posterior parameters in the behavior model ensembles. **a.** DBME; **b.** SBME; **c.** LBME. The dots represent the Pearson correlation coefficients with P-value < 0.05. The correlation matrix has been divided into 10 areas according to different ecosystem processes. Snow dynamics: 1, 2, 3 and 4; Soil heat and soil water: 2, 5, 6 and 7; Plant growth: 3, 6, 8 and 9; Soil decomposition: 4, 7, 9 and 10.

## References

Jansson, P.-E. and Karlberg, L.: Coupled heat and mass transfer model for soil–plant–atmosphere systems, Royal Institute of Technology, Stockholm, 484 pp., available at: <http://www.coupmoel.com/documentation>, 2010.
